# Supplementary material
Source: publisher site journal article supplement (https://www.spandidos-publications.com/2183/downloadSupplementary)

Figure S1. Effect of TIPE1 on the cell cycle distribution in ovarian cancer cells. (A) Cell cycle distribution of A2780-Ctrl and A2780-TIPE1 cells. (B) BrdU analysis of A2780-Ctrl and A2780-TIPE1 cells. Scale bar, 100  $\mu$ m. The percentage of BrdU positive cells in each frame were counted and analyzed. TIPE1, tumor necrosis factor- $\alpha$ -induced protein 8-like 1; Ctrl, control; BrdU, 5-bromo-2-deoxyuridine.

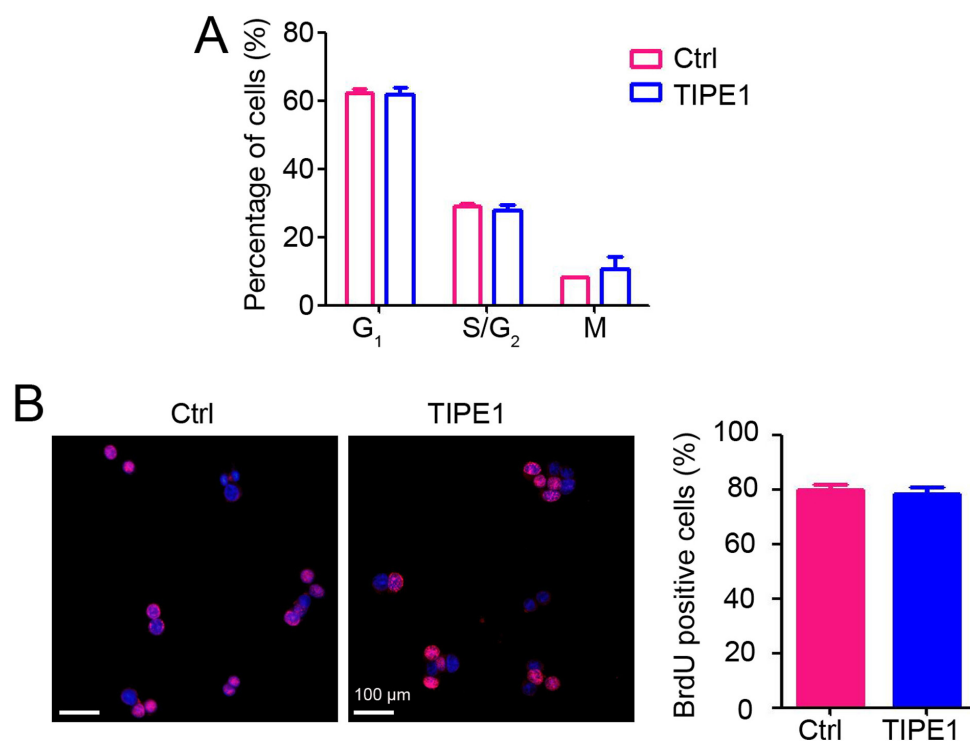

Supplement: Supplementary file 1 [file downloadSupplementary]
